# Supplementary material for: Antiviral activity of amide-appended α-hydroxytropolones against herpes simplex virus-1 and -2
Source: Royal Society of Chemistry journal article supplement (doi:10.1039/d2ra06749h), 2023-01-01

# Amide-Containing $\alpha$ -Hydroxytropolones as Inhibitors of Herpes Simplex Virus Replication

Andreu Gazquez Casals,<sup>1†</sup> Alex J. Berkowitz,<sup>2,3,†</sup> Alice J. Yu,<sup>1</sup> Hope E. Waters,<sup>1</sup> Daniel V. Schiavone,<sup>2,3</sup>  
Diana M. Kapkayeva,<sup>2</sup> Lynda A. Morrison<sup>1\*</sup> and Ryan P. Murelli<sup>2,3,4\*</sup>

<sup>1</sup> Department of Molecular Microbiology and Immunology, Saint Louis University School of Medicine, St. Louis, MO, US;  
andreu.gazquez@health.slu.edu (A.G.C.); [alice.yu@slu.edu](mailto:alice.yu@slu.edu) (A.J.Y.); [hope.waters@slu.edu](mailto:hope.waters@slu.edu) (H.E.W.);  
[lynda.morrison@health.slu.edu](mailto:lynda.morrison@health.slu.edu) (L.A.M.)

<sup>2</sup> Department of Chemistry, Brooklyn College, The City University of New York, Brooklyn, NY, US;  
[alex.berkowitz@brooklyn.cuny.edu](mailto:alex.berkowitz@brooklyn.cuny.edu) (A.J.B.); [daniel.schiavone@brooklyn.cuny.edu](mailto:daniel.schiavone@brooklyn.cuny.edu) (D.V.S);

<sup>3</sup> PhD Program in Chemistry, The Graduate Center, The City University of New York, New York, NY, US

<sup>4</sup> PhD Program in Biochemistry, The Graduate Center, The City University of New York, New York, NY, US;

<sup>†</sup> Authors contributed equally

\* Correspondence: [lynda.morrison@health.slu.edu](mailto:lynda.morrison@health.slu.edu) (L. A. M.); [rpmurelli@brooklyn.cuny.edu](mailto:rpmurelli@brooklyn.cuny.edu) (R.P.M.)

## <sup>1</sup>H NMR Spectra of Newly Synthesized Molecules

### Table of Contents

---

|                                                                                                                                              |     |
|----------------------------------------------------------------------------------------------------------------------------------------------|-----|
| 4,6-dihydroxy-2-methyl-5-oxo- <i>N</i> -(pyren-1-yl)cyclohepta-1,3,6-triene-1-carboxamide ( <b>1435</b> ).....                               | s-2 |
| 4-(6-cyclohexyl-1,2,3,4-tetrahydroisoquinoline-2-carbonyl)-2,7-dihydroxy-5-methylcyclohepta-2,4,6-trien-1-one ( <b>1436</b> ).....           | s-2 |
| 4,6-dihydroxy- <i>N</i> -((1-(4-isopropylphenyl)cyclopentyl)methyl)-2-methyl-5-oxocyclohepta-1,3,6-triene-1-carboxamide ( <b>1437</b> )..... | s-3 |
| 2,7-dihydroxy-4-methyl-5-(spiro[adamantane-2,4'-piperidine]-1'-carbonyl)cyclohepta-2,4,6-trien-1-one ( <b>1438</b> ).....                    | s-3 |



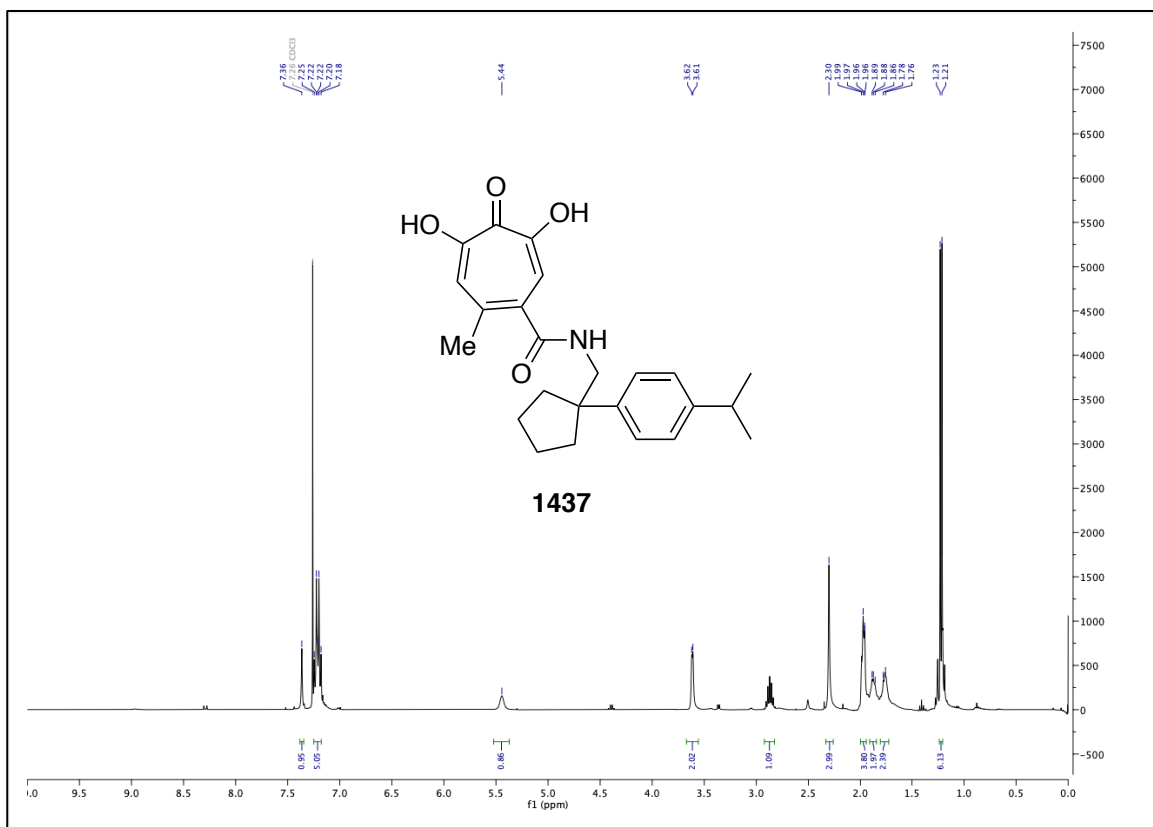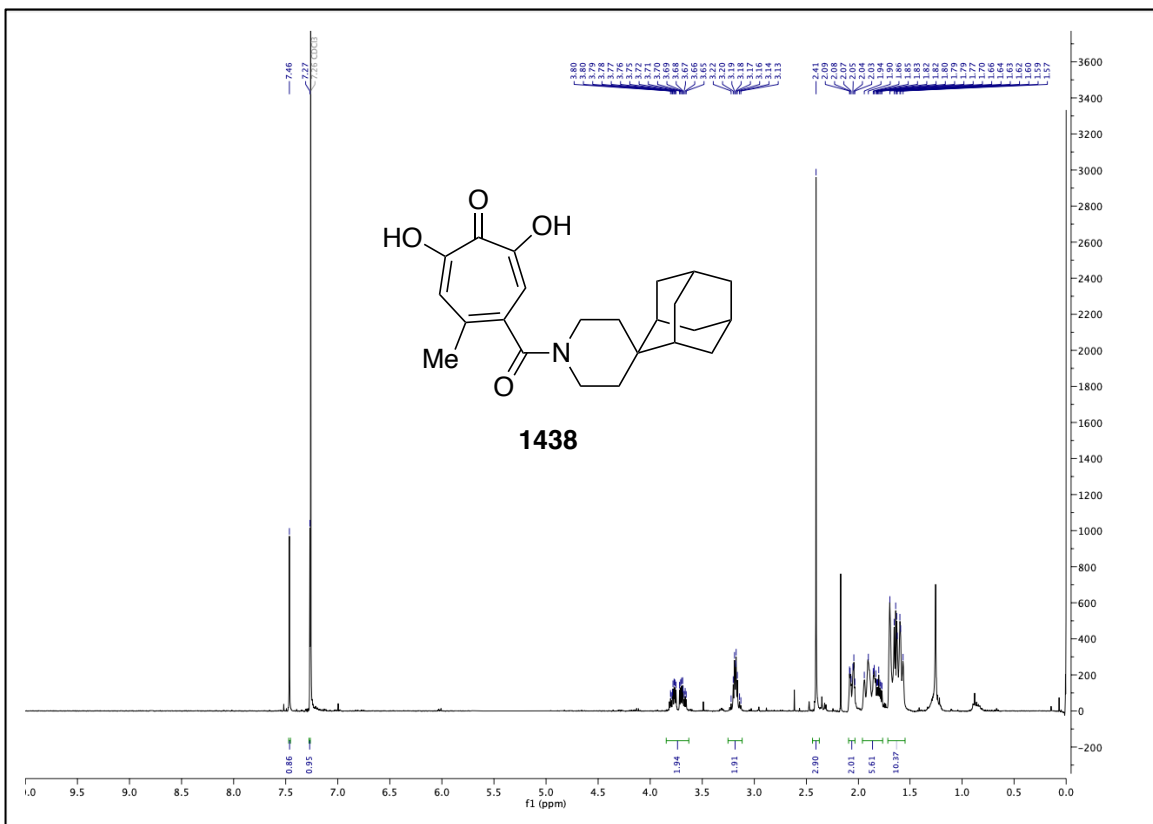

Supplement: d2ra06749h1.pdf [file d2ra06749h1.pdf]
